# Supplementary material for: Development of a Scoring System to Differentiate Severe Fever with Thrombocytopenia Syndrome from Scrub Typhus
Source: MDPI journal article supplement (doi:10.3390/v14051093), 2022-05-19
Supplement: s1 [file s1]

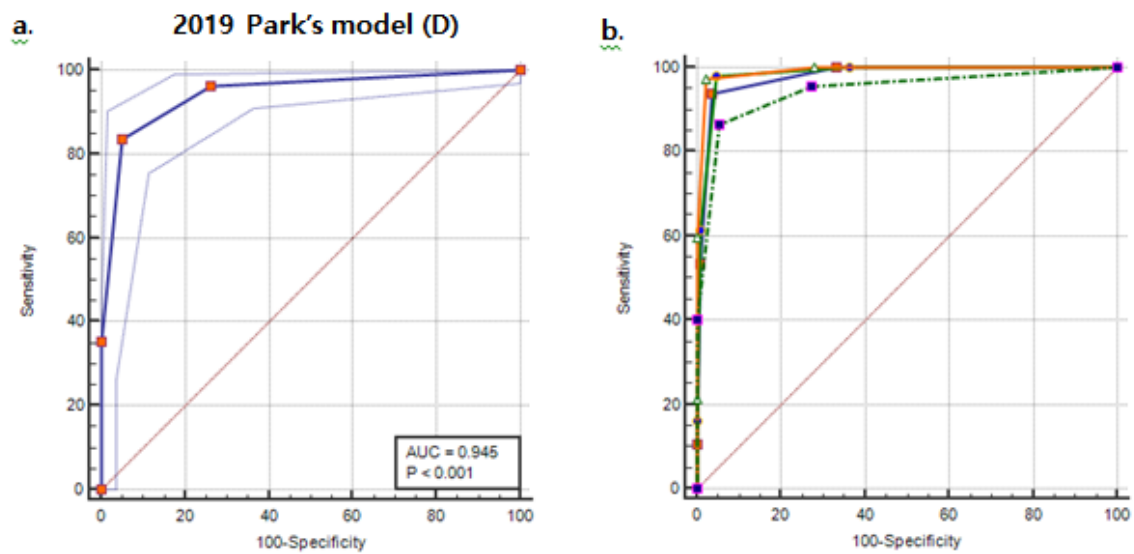

**Figure S1.** Receiver operating characteristic (ROC) curves of the multivariable logistic regression models (**a.** model D: leukopenia, thrombocytopenia, normal CRP level [ $<1.0$  mg/dL], **b.** square: model A (altered mental status, leukopenia, prolonged aPTT, normal CRP level [ $\leq 1.0$  mg/dL]), circle: model B (altered mental status, leukopenia, prolonged aPTT, normal CRP level [ $\leq 3.0$  mg/dL]), triangle: model C (leukopenia, prolonged aPTT, normal CRP level [ $\leq 3.0$  mg/dL], elevated CK level [ $>1000$  IU/L]), dotted line: model D (leukopenia, thrombocytopenia, normal CRP level [ $<1.0$  mg/dL]) for the SFTS predictive model> .
