# Supplementary material for: Development of a Scoring System to Differentiate Severe Fever with Thrombocytopenia Syndrome from Scrub Typhus
Source: MDPI journal article supplement (doi:10.3390/v14051093), 2022-05-19
Supplement: s1 [file s1]

**Table S1.** Clinical characteristics and outcomes of severe fever with thrombocytopenia syndrome and scrub typhus.

| Variable                                               | SFTS ( <i>n</i> =183)<br>No. (%) or Mean (SD) | Scrub typhus ( <i>n</i> =178)<br>No. (%) or Mean (SD) | <i>p</i> value |
|--------------------------------------------------------|-----------------------------------------------|-------------------------------------------------------|----------------|
| Season (months)                                        |                                               |                                                       | <.001          |
| Spring–Summer (March–August)                           | 102 (56)                                      | 0                                                     |                |
| Autumn–Winter (September–February)                     | 81 (44)                                       | 178 (100)                                             |                |
| Geographic distribution (residential area)             |                                               |                                                       | <.001          |
| Metropolitan area                                      | 12 (7)                                        | 55 (31)                                               |                |
| Province                                               | 171 (93)                                      | 121 (69)                                              |                |
| Geographic distribution (infected area)                |                                               |                                                       | .010           |
| Metropolitan area                                      | 8 (4)                                         | 16 (12)                                               |                |
| Province                                               | 172 (96)                                      | 113 (88)                                              |                |
| Age, mean (SD), year                                   | 66 (14)                                       | 69 (13)                                               | .044           |
| Male sex                                               | 95 (52)                                       | 68 (38)                                               | .010           |
| Underlying disease                                     |                                               |                                                       |                |
| Previously healthy                                     | 85 (46)                                       | 67 (39)                                               | .141           |
| Diabetes                                               | 37 (20)                                       | 39 (23)                                               | .477           |
| Hypertension                                           | 71 (39)                                       | 62 (37)                                               | .715           |
| Cerebrovascular disease                                | 12 (7)                                        | 16 (10)                                               | .313           |
| Congestive heart failure                               | 3 (2)                                         | 6 (4)                                                 | .321           |
| Asthma                                                 | 1 (1)                                         | 0 (0)                                                 | >.99           |
| COPD                                                   | 3 (2)                                         | 3 (2)                                                 | >.99           |
| Solid tumor                                            | 5 (3)                                         | 8 (5)                                                 | .304           |
| Chronic liver disease                                  | 8 (5)                                         | 5 (3)                                                 | .366           |
| Chronic kidney disease                                 | 3 (2)                                         | 3 (2)                                                 | >.99           |
| Immunosuppressive condition                            | 0                                             | 0                                                     |                |
| Symptom duration before hospital visit, mean (SD), day | 4.5 (3.3)                                     | 7.2 (4.0)                                             | <.001          |
| Clinical characteristics                               |                                               |                                                       |                |
| Fever                                                  | 169 (93)                                      | 161 (93)                                              | .905           |
| Chillness                                              | 115 (65)                                      | 143 (90)                                              | <.001          |
| Myalgia                                                | 86 (47)                                       | 121 (74)                                              | <.001          |
| Fatigue                                                | 48 (27)                                       | 133 (91)                                              | <.001          |
| Ophthalmalgia                                          | 1 (1)                                         | 37 (26)                                               | <.001          |
| Sore throat                                            | 7 (4)                                         | 44 (32)                                               | <.001          |
| Thirst                                                 | 15 (9)                                        | 111 (75)                                              | <.001          |
| Cough                                                  | 26 (15)                                       | 50 (33)                                               | <.001          |
| Dyspnea                                                | 34 (20)                                       | 32 (22)                                               | .557           |
| GI symptoms                                            |                                               |                                                       |                |
| Anorexia                                               | 67 (38)                                       | 105 (71)                                              | <.001          |
| Nausea                                                 | 68 (39)                                       | 66 (40)                                               | .762           |
| Vomiting                                               | 34 (19)                                       | 33 (21)                                               | .765           |
| Diarrhea                                               | 60 (34)                                       | 29 (18)                                               | <.001          |
| Dyspepsia                                              | 12 (7)                                        | 49 (34)                                               | <.001          |
| Abdominal pain                                         | 39 (22)                                       | 39 (25)                                               | .514           |
| Hemorrhagic symptoms                                   | 28 (15)                                       | 9 (5)                                                 | .002           |
| Hemoptysis                                             | 4 (2)                                         | 4(3)                                                  | .735           |
| Hematemesis/melena                                     | 5 (3)                                         | 3 (2)                                                 | >.99           |
| Purpura                                                | 6 (4)                                         | 3 (2)                                                 | .736           |
| CNS symptoms                                           |                                               |                                                       |                |
| Headache                                               | 55 (31)                                       | 103 (63)                                              | <.001          |
| Neck stiffness                                         | 13 (8)                                        | 13(11)                                                | .265           |
| Altered mental status                                  | 69 (39)                                       | 27 (16)                                               | <.001          |
| Skin rash                                              | 28 (16)                                       | 142 (83)                                              | <.001          |
| Conjunctival injection                                 | 12 (7)                                        | 20 (15)                                               | .026           |

|                                                             |             |             |       |
|-------------------------------------------------------------|-------------|-------------|-------|
| Lymphadenopathy                                             | 18 (10)     | 24 (18)     | .066  |
| Tick or chigger bite wound                                  | 54 (31)     | 154 (92)    | <.001 |
| Typical eschar                                              | 22 (17)     | 154 (100)   | <.001 |
| Laboratory findings                                         |             |             |       |
| Leukopenia (WBC count<4000/ $\mu$ L)                        | 164 (90)    | 25 (15)     | <.001 |
| Leukocytosis (WBC count>10,000/ $\mu$ L)                    | 4 (2)       | 57 (34)     | <.001 |
| WBC count, mean (SD), WBCs/ $\mu$ L                         | 2457 (2670) | 8454 (4944) | <.001 |
| Thrombocytopenia (PLT count <150X10 <sup>3</sup> / $\mu$ L) | 173 (95)    | 114 (68)    | <.001 |
| Thrombocytopenia (PLT count <100X10 <sup>3</sup> / $\mu$ L) | 137 (75)    | 43 (26)     | <.001 |
| Thrombocytopenia (PLT count <50X10 <sup>3</sup> / $\mu$ L)  | 53 (29)     | 9 (5)       | <.001 |
| Platelet count, mean (SD), x10 <sup>3</sup> / $\mu$ L       | 77 (43)     | 185 (577)   | .016  |
| Anemia (Hb<11g/dL)                                          | 14 (8)      | 23 (14)     | .066  |
| Hemoglobin, mean (SD), g/dL                                 | 13.5 (1.8)  | 13.8 (11.4) | .800  |
| Prolonged PT (INR >1.3)                                     | 8 (5)       | 10 (6)      | .750  |
| INR, mean (SD)                                              | 1.1 (0.2)   | 2.0 (8.1)   | .164  |
| Prolonged aPTT (>40 seconds)                                | 87 (55)     | 6 (4)       | <.001 |
| aPTT, mean (SD), seconds                                    | 49 (44)     | 33 (14)     | <.001 |
| Normal CRP level ( $\leq$ 3.0 mg/dL)                        | 146 (88)    | 9 (6)       | <.001 |
| Normal CRP level ( $\leq$ 1.0 mg/dL)                        | 110 (66)    | 2 (1)       | <.001 |
| CRP, mean (SD), mg/dL                                       | 2.0 (6.9)   | 11.2 (9.5)  | <.001 |
| Renal dysfunction (Cr>1.30)                                 | 33 (22)     | 34 (27)     | .292  |
| Creatinine, mean (SD), mg/dL                                | 1.2 (1.0)   | 1.7 (5.9)   | .309  |
| Abnormal LFT (AST or ALT>40 IU/L)                           | 141 (78)    | 154 (92)    | <.001 |
| AST, mean (SD), IU/L                                        | 226 (418)   | 118 (111)   | .001  |
| ALT, mean (SD), IU/L                                        | 87 (119)    | 87 (80)     | .988  |
| Alkaline phosphatase, mean (SD), IU/L                       | 90 (94)     | 125 (106)   | .007  |
| Total bilirubin, mean (SD), mg/dL                           | 0.6 (0.6)   | 0.9 (0.5)   | <.001 |
| Rhabdomyolysis feature (CK>1000IU/L)                        | 58 (45)     | 5 (3)       | <.001 |
| Creatine kinase, mean (SD), IU/L                            | 1866 (4747) | 227 (558)   | <.001 |
| Lactate dehydrogenase, mean (SD), IU/L                      | 1086 (1825) | 849 (258)   | .144  |
| Complications                                               |             |             |       |
| Meningoencephalitis                                         | 12 (7)      | 21 (13)     | .056  |
| Seizure                                                     | 9 (5)       | 0           | .004  |
| Arrhythmia                                                  | 10 (6)      | 3 (2)       | .070  |
| Pneumonia                                                   | 5 (3)       | 15 (9)      | .011  |
| Hemophagocytic lymphohistiocytosis                          | 4 (2)       | 0           | .143  |
| Clinical course                                             |             |             |       |
| ICU admission                                               | 73 (40)     | 15 (9)      | <.001 |
| Mechanical ventilation                                      | 32 (23)     | 7 (4)       | <.001 |
| In-hospital death                                           | 40 (22)     | 4 (2)       | <.001 |

Abbreviations: COPD, Chronic obstructive pulmonary disease; GI, gastrointestinal; CNS, central nervous system; ICU, intensive care unit
