# Supplementary material for: Development of a Scoring System to Differentiate Severe Fever with Thrombocytopenia Syndrome from Scrub Typhus
Source: MDPI journal article supplement (doi:10.3390/v14051093), 2022-05-19
Supplement: s1 [file s1]

**Table S2.** Univariable logistic regression analysis of parameters predictive of severe fever with thrombocytopenia syndrome.

| Univariable Logistic Regression Analysis                  | Odds Ratio<br>(95% CI)   | <i>p</i> Value |
|-----------------------------------------------------------|--------------------------|----------------|
| Season                                                    | 0.00                     | 0.996          |
| Geographic distribution (residential area)                | 6.477 (3.326–12.613)     | <0.001         |
| Geographic distribution (infected area)                   | 3.044 (1.261–7.349)      | 0.013          |
| Age                                                       | 0.984 (0.968–1.000)      | 0.046          |
| Male sex                                                  | 0.578 (0.380–0.879)      | 0.010          |
| Chillness                                                 | 0.204 (0.112–0.373)      | <0.001         |
| Myalgia                                                   | 0.311 (0.197–0.491)      | <0.001         |
| Fatigue                                                   | 0.039 (0.020–0.073)      | <0.001         |
| Ophthalmalgia                                             | 0.021 (0.003–0.159)      | <0.001         |
| Sore throat                                               | 0.093 (0.040–0.214)      | <0.001         |
| Thirst                                                    | 0.032 (0.017–0.062)      | <0.001         |
| Cough                                                     | 0.356 (0.208–0.610)      | <0.001         |
| Anorexia                                                  | 0.258 (0.162–0.410)      | <0.001         |
| Diarrhea                                                  | 2.447 (1.472–4.067)      | 0.001          |
| Dyspepsia                                                 | 0.147 (0.075–0.291)      | <0.001         |
| Hemorrhagic symptoms                                      | 3.212 (1.468–7.028)      | 0.003          |
| Headache                                                  | 0.260 (0.166–0.408)      | <0.001         |
| Altered mental status                                     | 3.376 (2.028–5.621)      | <0.001         |
| Skin rash                                                 | 0.040 (0.023–0.070)      | <0.001         |
| Conjunctival injection                                    | 0.431 (0.203–0.917)      | 0.029          |
| Tick or chigger bite wound                                | 0.040 (0.021–0.075)      | <0.001         |
| Leukopenia (WBC count <4000/ $\mu$ L)                     | 52.116 (27.315–99.434)   | <0.001         |
| Leukocytosis (WBC count >10,000/ $\mu$ L)                 | 0.044 (0.015–0.124)      | <0.001         |
| Thrombocytopenia (PLT count <150 $\times 10^3$ / $\mu$ L) | 8.195 (4.009–16.751)     | <0.001         |
| Thrombocytopenia (PLT count <100 $\times 10^3$ / $\mu$ L) | 8.658 (5.350–14.009)     | <0.001         |
| Thrombocytopenia (PLT count <50 $\times 10^3$ / $\mu$ L)  | 7.203 (3.424–15.151)     | <0.001         |
| Prolonged aPTT (>40 seconds)                              | 32.729 (13.659–78.420)   | <0.001         |
| Normal CRP level ( $\leq 3.0$ mg/dL)                      | 107.067 (47.101–243.379) | <0.001         |
| Normal CRP level ( $\leq 1.0$ mg/dL)                      | 136.518 (32.590–571.861) | <0.001         |
| Abnormal LFT (AST or ALT level >40 IU/L)                  | 0.305 (0.156–0.595)      | <0.001         |
| Alkaline phosphatase level                                | 0.996 (0.994–0.999)      | 0.012          |
| Total bilirubin level                                     | 0.228 (0.118–0.440)      | <0.001         |
| Elevated CK level (>1000 IU/L)                            | 23.200 (8.905–60.441)    | <0.001         |

Abbreviations: CI, confidence interval; WBC, white blood cell; aPTT, activated partial thromboplastin time; CRP, C-reactive protein; LFT, liver function test; AST, aspartate aminotransferase; ALT, alanine aminotransferase; CK, creatine kinase.
