# Supplementary material for: Development of a Scoring System to Differentiate Severe Fever with Thrombocytopenia Syndrome from Scrub Typhus
Source: MDPI journal article supplement (doi:10.3390/v14051093), 2022-05-19
Supplement: s1 [file s1]

**Table S3.** Diagnostic performance of the clinical scoring system in differentiating severe fever with thrombocytopenia syndrome.

| Clinical Score*<br>(n=247) | SFTS<br>(n=112) | Scrub Typhus<br>(n=135) | Sensitivity<br>(95% CI) | Specificity<br>(95% CI) | Positive Likelihood<br>Ratio (95% CI) | Negative<br>Likelihood Ratio<br>(95% CI) | Positive<br>Predictive Value | Negative<br>Predictive Value |
|----------------------------|-----------------|-------------------------|-------------------------|-------------------------|---------------------------------------|------------------------------------------|------------------------------|------------------------------|
| >0                         | 112             | 37                      | 100.0 (96.8–<br>100.0)  | 72.6 (64.3–79.9)        | 3.7 (2.8–4.8)                         | 0                                        | 75.2 (69.7–79.9)             | 100.0                        |
| >1                         | 109             | 3                       | 97.3 (92.4–99.4)        | 97.8 (93.6–99.5)        | 43.8 (14.3–134.1)                     | 0.03 (0.009–0.08)                        | 97.3 (92.2–99.1)             | 97.8 (93.5–99.3)             |
| >2                         | 67              | 0                       | 59.8 (50.1–69.0)        | 100.0 (97.3–100.0)      | NA                                    | 0.40 (0.3–0.5)                           | 100.0                        | 75.0 (70.5–79.0)             |
| >3                         | 24              | 0                       | 21.4 (14.2–30.2)        | 100.0 (97.3–100.0)      | NA                                    | 0.79 (0.7–0.9)                           | 100.0                        | 60.5 (58.2–62.8)             |

\* Scoring system = (1 x leukopenia) + (1 x prolonged aPTT) + (1 x normal CRP level  $\leq$ 3.0 mg/dL) + (1 x elevated CK level). Abbreviations: CI, confidence interval; SFTS, severe fever with thrombocytopenia syndrome; aPTT, activated partial thromboplastin time; CRP, C-reactive protein; CK, creatine kinas
